# Supplementary material for: Effect of the food matrix on the (poly)phenol stability of different plant-based meat products and their main ingredients after in vitro gastrointestinal digestion
Source: Royal Society of Chemistry journal article supplement (doi:10.1039/d3fo03265e), 2023-01-01
Supplement: d3fo03265e1.pdf [file d3fo03265e1.pdf]

- 1 Supplemented Table 1. Nutritional value of plant-based pâtés: tomato-pâté (TPâté) and
- 2 pepper-pate (PPâté). Values expressed as g/100g pâté.

|                        | <b>TPâté</b> | <b>PPâté</b> |
|------------------------|--------------|--------------|
| Energy (Kcal)          | 378          | 130          |
| Total Fat (g)          | 34           | 6.8          |
| Saturated fat (g)      | 4.7          | 1.3          |
| Toal Carbohydrates (g) | 11           | 15           |
| Sugars (g)             | 4.2          | 3.6          |
| Proteins (g)           | 6.5          | 1.9          |
| Salt (g)               | 2.7          | 1.7          |

3
